# Supplementary material for: Meal Timing and Macronutrient Composition Modulate Human Metabolism and Reward-Related Drive to Eat
Source: Nutrients. 2022 Jan 27;14(3):562. doi: 10.3390/nu14030562 (PMC8839823; doi:10.3390/nu14030562)

## Supplementary Materials

**Figure S1.** Glucose (a) and insulin (b) area under the curve after the intake of a regular- and high-carbohydrate morning and evening meal. Data presented as mean  $\pm$  SEM. In (a): \*\*\*\*  $p < 0.00001$  for ANOVA 'time-of-day  $\times$  condition'; in (b): \*\*\*\*  $p < 0.0001$  for ANOVA 'time-of-day'. CH: carbohydrates.

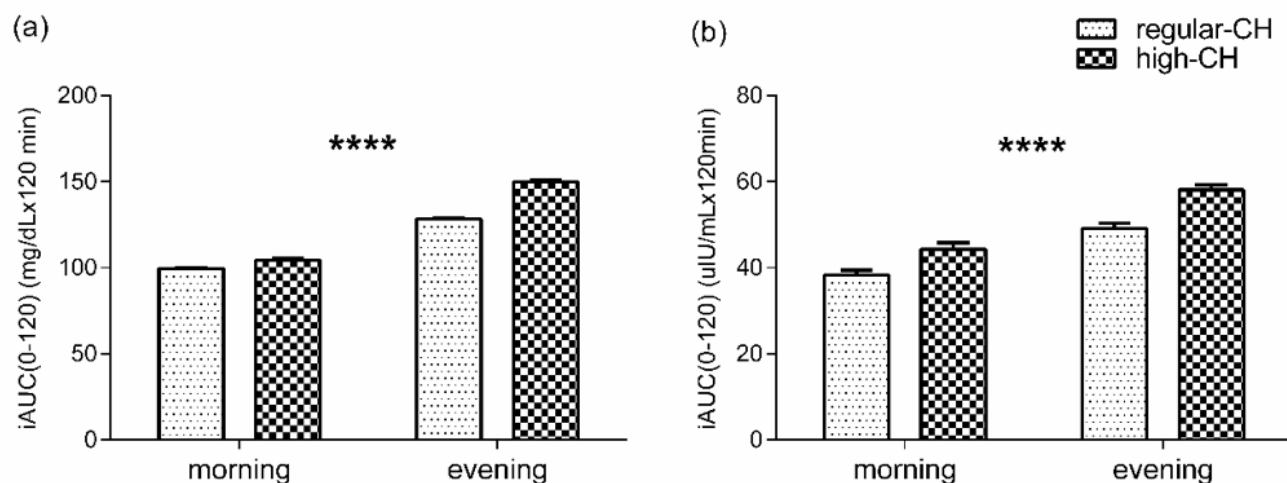

**Figure S2.** Plasma cortisol concentration before and after the intake of a regular- (left columns, (a)), and high- (right columns, (b)), carbohydrate morning and evening meal. Food intake period is depicted as a grey colored bar. Morning (white circles, solid line) and evening (black circles, dashed line) meal. Blackline below asterisk denotes all time points with significant morning vs. evening differences (in (a) all morning vs. evening comparison  $p < 0.01$ ). Data presented as mean  $\pm$  SEM. Differences between both times of the day (morning vs. evening): \*  $p < 0.05$ , \*\*\*  $p < 0.001$ . CH: carbohydrates.

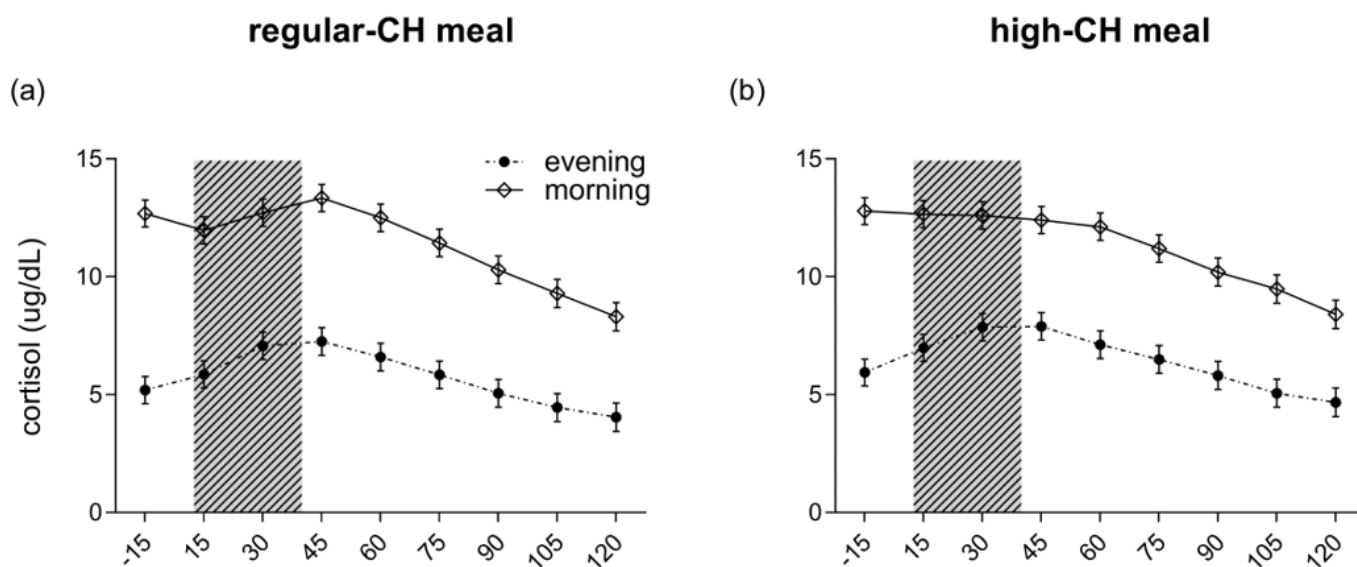

Supplement: Supplementary file 1 [file nutrients-14-00562-s001.zip › Supplementary.pdf]
